# Supplementary material for: miR-149 represses metastasis of hepatocellular carcinoma by targeting actin-regulatory proteins PPM1F
Source: PubMed Central journal article supplement (PMC4741967; doi:10.18632/oncotarget.5676), 2015-10-14
Supplement: oncotarget-06-37808-s001.pdf [file oncotarget-06-37808-s001.pdf]

SUPPLEMENTARY FIGURES AND TABLES

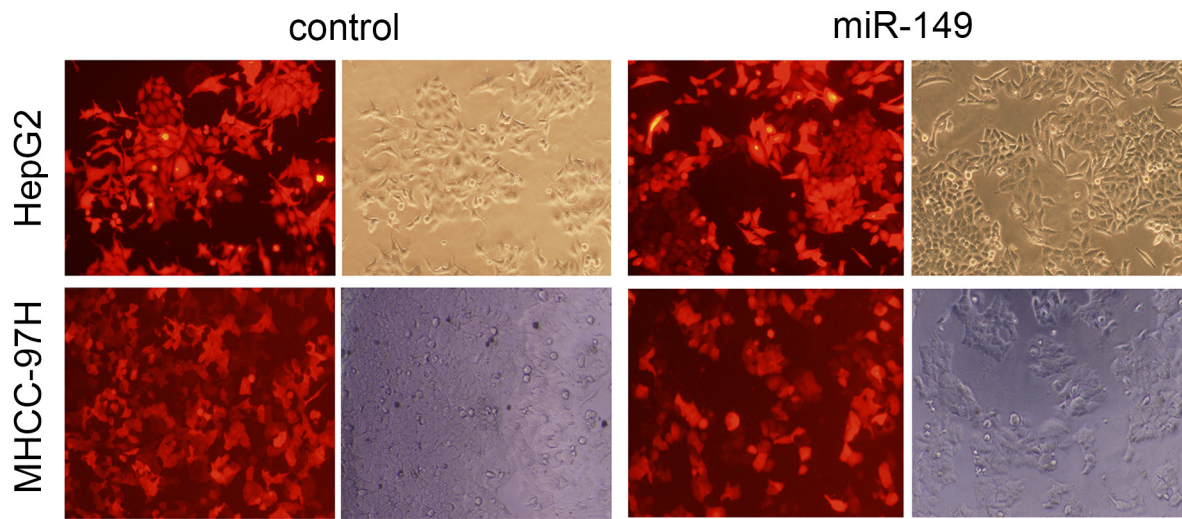

Supplementary Figure S1: HepG2 and MHCC-97H cells transduced with miR-149 over-expression or negative control lentivirus were used in the study; the lentivirus was labeled with red fluorescence protein (RFP).

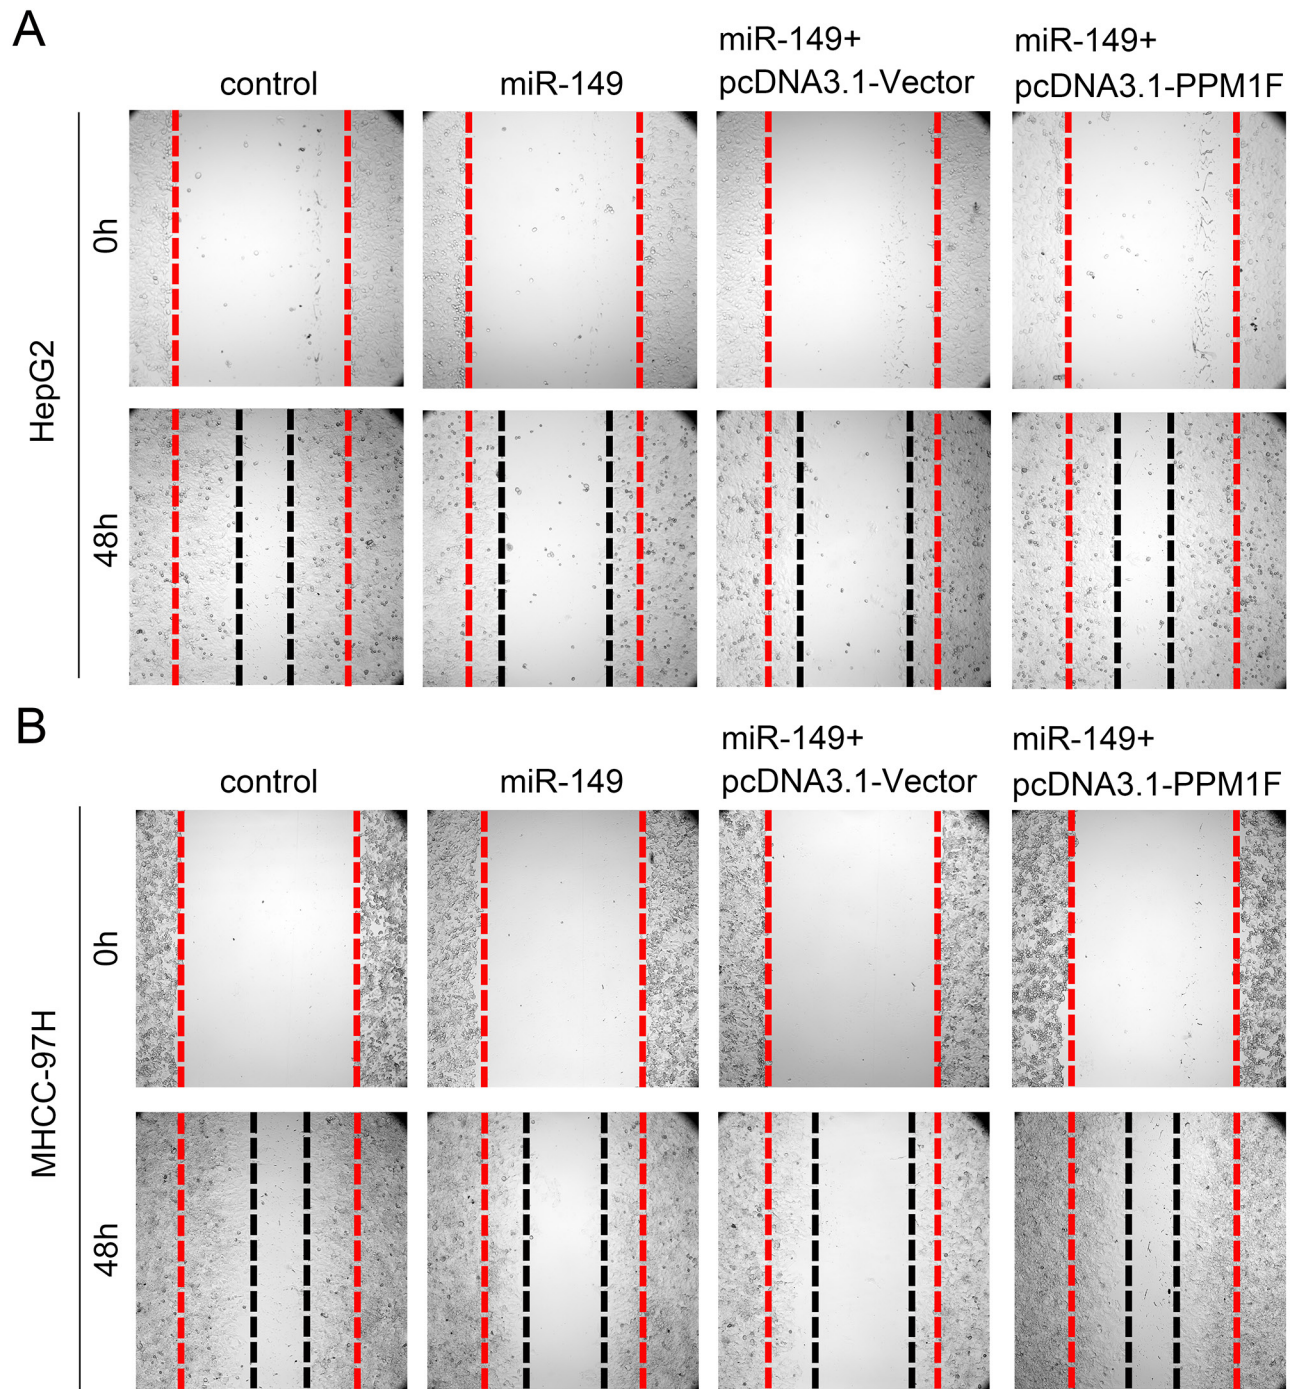

Supplementary Figure S2: Wound healing assay was performed in HepG2 A. and MHCC-97H B. cells after transduction with miR-149 or negative control lentivirus, and transfection with pcDNA3.1-Vector or pcDNA3.1-PPM1F plasmid.

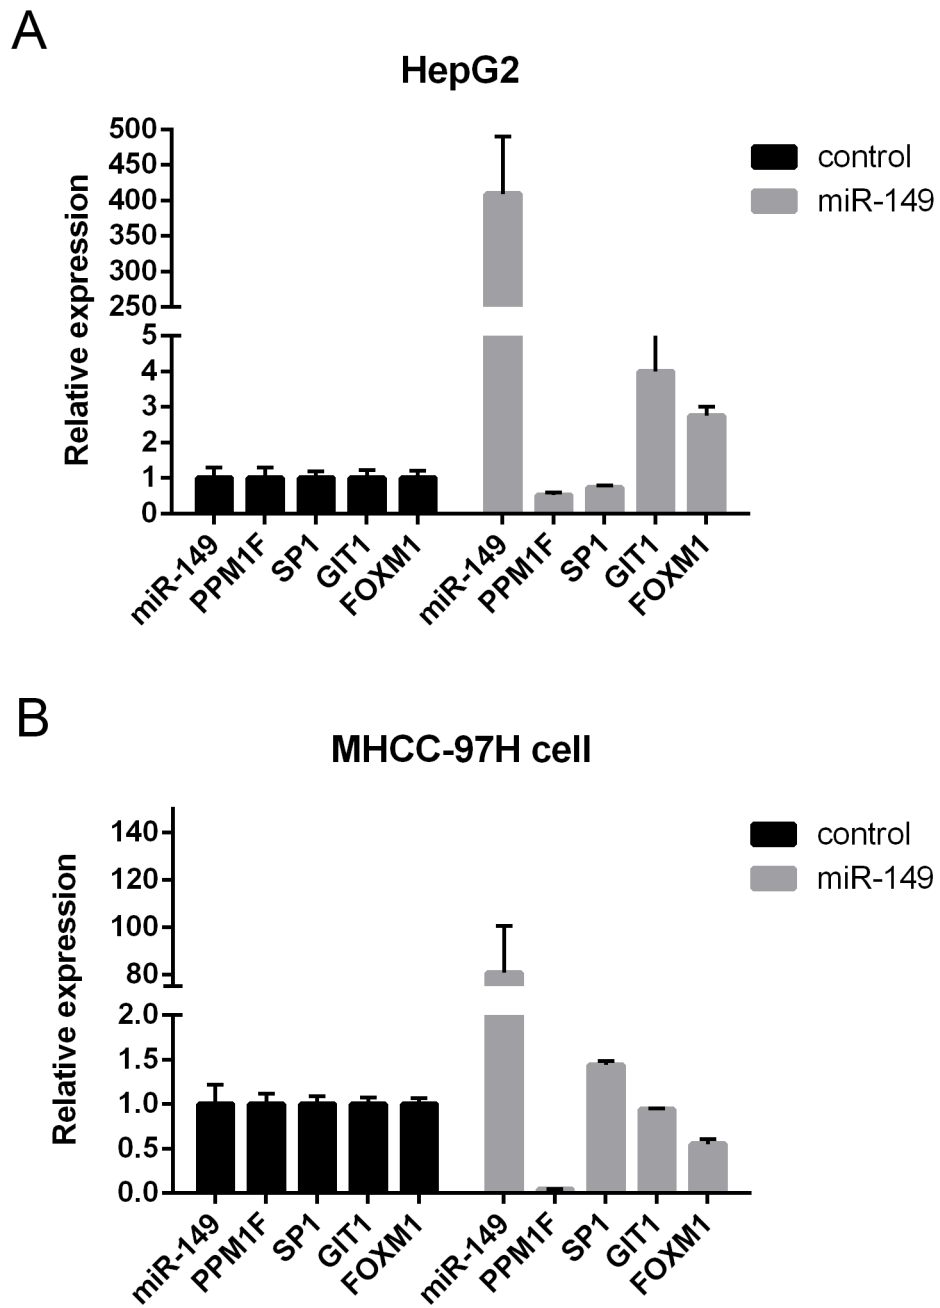

Supplementary Figure S3: qRT-PCR was performed in HepG2 A. and MHCC-97H B. cells to analyze the effect of miR-149 overexpression on the expression of PPM1F and other putative target genes (SP1, GIT1, FOXM1).

**Supplementary Table S1: Sequences of primers used for qRT-PCR**

| Transcript | Sequence                        | Size   |
|------------|---------------------------------|--------|
| PPM1F      | 5'-GGAGGAGGACGATGACGAGGAG-3'    | 82 bp  |
|            | 5'-GCGGTTAAAGAAACTCTGTGCCAG-3'  |        |
| SP1        | 5'-ATTGGGTACTTCAGGAATCCAGGTG-3' | 115 bp |
|            | 5'-TCCATCACCACCAGCCCCAT-3'      |        |
| GIT1       | 5'-TAAAGCCAACCCCAAGACAAAG-3'    | 116 bp |
|            | 5'-CGGTGACTCCATCATCGTCCC-3'     |        |
| FOXM1      | 5'-CAAAGGACAGAAGTGACCCTGGAG-3'  | 116 bp |
|            | 5'-CACCATCACAGGTCTCCCGTTTC-3'   |        |
| GAPDH      | 5'-CATGAGAAGTATGACAACAGCCT-3'   | 113 bp |
|            | 5'-AGTCCTTCCACGATAACCAAAGT-3'   |        |
| miR-149    | 5'-ATTCTCTCATCTGGCTCCGTGT-3'    | 72 bp  |
|            | 5'-TATGGTTGTTCTGCTCTCTGTGTC-3'  |        |
| U6         | 5'-CAGCACATATACTAAAATTGGAACG-3' | 76 bp  |
|            | 5'-ACGAATTGCGTGTCAATCC-3'       |        |

**Supplementary Table S2: List of antibodies used for western blotting**

| Antibody                    | Host   | Supplier                  | Product No. | Working Dilution |
|-----------------------------|--------|---------------------------|-------------|------------------|
| anti-PPM1F                  | Mouse  | Santa Cruz Biotechnology  | J1311       | 1:1000           |
| anti-MLC2                   | Rabbit | Cell Signaling Technology | #3672       | 1:1000           |
| anti-pMLC2 (Thr18/Ser19)    | Rabbit | Cell Signaling Technology | #3674       | 1:1000           |
| anti-PDGFR $\alpha$         | Rabbit | Epitomics                 | #3938-1     | 1:1000           |
| anti-SP1                    | Rabbit | Epitomics                 | #5407-1     | 1:1000           |
| anti-YWHAZ                  | Rabbit | Epitomics                 | #5175-1     | 1:10000          |
| anti-RAP1                   | Rabbit | Epitomics                 | #2291-1     | 1:500            |
| anti-CD47                   | Rabbit | Epitomics                 | #3847-1     | 1:1000           |
| HRP-coupled anti-mouse IgG  | Goat   | Santa Cruz Biotechnology  | sc-2055     | 1:10,000         |
| HRP-coupled anti-rabbit IgG | Goat   | Santa Cruz Biotechnology  | sc-2005     | 1:10,000         |
